# Supplementary material
Source: MDPI journal article supplement (https://www.mdpi.com/1424-2818/14/10/830)
Supplement: s1 [file s1]

**Table S2.** The sixteen variables used for correlation in variance inflation factor (VIF).

| <b>Variable No.</b> | <b>Bioclimatic variable</b>                               | <b>Code</b>   |
|---------------------|-----------------------------------------------------------|---------------|
| <b>1</b>            | Annual mean temperature                                   | <b>bio_1</b>  |
| <b>2</b>            | Mean diurnal range (Mean of monthly (max temp -min temp)) | <b>bio_2</b>  |
| <b>3</b>            | Isothermality (bio2/bio7) (*100)                          | <b>bio_3</b>  |
| <b>4</b>            | Temperature seasonality (standard deviation * 100)        | <b>bio_4</b>  |
| <b>5</b>            | Maximum temperature of warmest month                      | <b>bio_5</b>  |
| <b>6</b>            | Minimum temperature of coldest month                      | <b>bio_6</b>  |
| <b>7</b>            | Temperature annual range (Bio5–Bio6)                      | <b>bio_7</b>  |
| <b>8</b>            | Mean temperature of warmest quarter                       | <b>bio_10</b> |
| <b>9</b>            | Mean temperature of coldest quarter                       | <b>bio_11</b> |
| <b>10</b>           | Annual precipitation                                      | <b>bio_12</b> |
| <b>11</b>           | Precipitation of wettest month                            | <b>bio_13</b> |
| <b>12</b>           | Precipitation of driest month                             | <b>bio_14</b> |
| <b>13</b>           | Precipitation seasonality (coefficient of variation)      | <b>bio_15</b> |
| <b>14</b>           | Precipitation of wettest quarter                          | <b>bio_16</b> |
| <b>15</b>           | Precipitation of driest quarter                           | <b>bio_17</b> |
| <b>16</b>           | Land use                                                  | <b>dom_lu</b> |
