# Supplementary material
Source: MDPI journal article supplement (https://www.mdpi.com/1424-2818/14/10/830)
Supplement: s1 [file s1]

**Table S5.** Projected area size between protected area and unprotected area for the seven *Nymphaea* species accessible area in South America.

| <b>Land use</b>       | <b>Total Area</b> | <b>Protected Area</b> | <b>Unprotected Area</b> |
|-----------------------|-------------------|-----------------------|-------------------------|
| >75% crops            | 3806.03           | 330.78                | 3475.25                 |
| >75% forest           | 5015686.23        | 1446685.82            | 3569000.42              |
| >75% grass/shrub      | 1080416.21        | 108331.91             | 972084.30               |
| >75% non-vegetated    | 95233.50          | 3555.93               | 91677.57                |
| 50-75% crops          | 62551.28          | 1819.31               | 60731.97                |
| 50- 75% forest        | 1477567.22        | 176308.11             | 1301259.10              |
| 50- 75% grass/shrub   | 2814394.05        | 122886.43             | 2691507.62              |
| 50- 75% non-vegetated | 63130.46          | 3721.33               | 59409.14                |
| >50% artificial       | 9763.30           | 578.87                | 9184.42                 |
| Mixed                 | 1311260.23        | 59127.72              | 1252132.51              |
| Water                 | 95895.42          | 15381.48              | 80513.94                |
