# Supplementary material
Source: MDPI journal article supplement (https://www.mdpi.com/1424-2818/14/10/830)
Supplement: s1 [file s1]

**Table S3.** Training (75%) and testing (25%) AUC values and their standard deviation values for the *Nymphaea* species distribution suitability using the Maximum training sensitivity plus specificity logistic threshold (MTSS). The AUC values describe the fitness of the model in predicting the species distribution.

| Species               | Scenario  | MTSS  | Training AUC | Test AUC | Standard Deviation |
|-----------------------|-----------|-------|--------------|----------|--------------------|
| <i>N. amazonum</i>    | Current   | 0.394 | 0.864        | 0.847    | 0.053              |
|                       | 4.5(2050) | 0.476 | 0.829        | 0.808    | 0.069              |
|                       | 4.5(2070) | 0.476 | 0.825        | 0.803    | 0.069              |
|                       | 8.5(2050) | 0.462 | 0.834        | 0.815    | 0.068              |
|                       | 8.5(2070) | 0.474 | 0.830        | 0.811    | 0.067              |
| <i>N. ampla</i>       | Current   | 0.391 | 0.919        | 0.878    | 0.059              |
|                       | 4.5(2050) | 0.331 | 0.927        | 0.887    | 0.045              |
|                       | 4.5(2070) | 0.331 | 0.927        | 0.889    | 0.044              |
|                       | 8.5(2050) | 0.312 | 0.928        | 0.891    | 0.045              |
|                       | 8.5(2070) | 0.321 | 0.921        | 0.879    | 0.048              |
| <i>N. jamesoniana</i> | Current   | 0.437 | 0.892        | 0.842    | 0.064              |
|                       | 4.5(2050) | 0.443 | 0.889        | 0.859    | 0.049              |
|                       | 4.5(2070) | 0.472 | 0.878        | 0.848    | 0.057              |
|                       | 8.5(2050) | 0.467 | 0.882        | 0.848    | 0.054              |
|                       | 8.5(2070) | 0.471 | 0.879        | 0.849    | 0.054              |
| <i>N. lasiophylla</i> | Current   | 0.169 | 0.973        | 0.963    | 0.018              |
|                       | 4.5(2050) | 0.175 | 0.969        | 0.953    | 0.027              |
|                       | 4.5(2070) | 0.188 | 0.967        | 0.951    | 0.028              |
|                       | 8.5(2050) | 0.197 | 0.967        | 0.953    | 0.029              |
|                       | 8.5(2070) | 0.228 | 0.969        | 0.958    | 0.023              |
| <i>N. lingulata</i>   | Current   | 0.431 | 0.915        | 0.902    | 0.054              |
|                       | 4.5(2050) | 0.327 | 0.904        | 0.890    | 0.054              |
|                       | 4.5(2070) | 0.330 | 0.901        | 0.889    | 0.055              |
|                       | 8.5(2050) | 0.346 | 0.904        | 0.891    | 0.051              |
|                       | 8.5(2070) | 0.355 | 0.895        | 0.882    | 0.056              |
| <i>N. pulchella</i>   | Current   | 0.385 | 0.932        | 0.927    | 0.031              |
|                       | 4.5(2050) | 0.277 | 0.940        | 0.936    | 0.024              |
|                       | 4.5(2070) | 0.276 | 0.939        | 0.935    | 0.024              |
|                       | 8.5(2050) | 0.265 | 0.942        | 0.938    | 0.024              |
|                       | 8.5(2070) | 0.265 | 0.938        | 0.933    | 0.025              |
| <i>N. rudgeana</i>    | Current   | 0.443 | 0.829        | 0.814    | 0.074              |
|                       | 4.5(2050) | 0.439 | 0.822        | 0.794    | 0.082              |
|                       | 4.5(2070) | 0.459 | 0.826        | 0.801    | 0.083              |
|                       | 8.5(2050) | 0.451 | 0.824        | 0.796    | 0.086              |
|                       | 8.5(2070) | 0.450 | 0.831        | 0.806    | 0.081              |
